# Supplementary material for: Mapping Helminth Co-Infection and Co-Intensity: Geostatistical Prediction in Ghana
Source: PLoS Negl Trop Dis. 2011 Jun 7;5(6):e1200. doi: 10.1371/journal.pntd.0001200 (PMC3110174; doi:10.1371/journal.pntd.0001200)
Supplement: Text S2 — Statistical notation of Bayesian geostatistical models for infection intensity of Schistosoma haematobium and hookworm in Ghana, 2008. (DOC) [file pntd.0001200.s002.doc]

**Text S2. Statistical notation of Bayesian geostatistical models for infection intensity of *S. haematobium* and hookwormin Ghana 2008.**

The MGB models for infection intensity were of the form of:

,and

*Where* and are the probability of non-zero infection intensity and the mean count of parasite eggs without taking overdisperstion into account in school *i*, age-sex group *j*, *α* is the intercept, *β* is a matrix of Z coefficients and *x* is a matrix of Z covariates, and *ui* are coefficients representing a geostatistical random effects. These random effects have a multinomial normal distribution, specified the same way as with models in Text S1. Non-informative priors were used for *α* (uniform prior with bounds - and ) and the coefficients (normal prior with mean = 0 and precision = 1 × 10-4). The prior distribution of was also uniform with upper and lower bounds set at 0.1 and 50. (the lower bound set to ensure spatial correlation at the maximum separating distance between survey locations was <0.5, assisting identifiability [1]).The precision of *ui*, was given a non-informative gamma distribution.

**References**

1. Thomas; A, Best; N, Lunn; D, Arnold; R, Spiegelhalter D (2004) GeoBUGS User Manual. Cambridge: Medical Research Council Biostatistics Unit.
